# Supplementary material for: Application of High Resolution Melt analysis (HRM) for screening haplotype variation in a non-model plant genus: Cyclopia (Honeybush)
Source: PeerJ. 2020 May 15;8:e9187. doi: 10.7717/peerj.9187 (PMC7233275; doi:10.7717/peerj.9187)
Supplement: Table S1 [file peerj-08-9187-s001.csv]

Sequence_ID	Specimen_voucher	Genbank accession number	Region	Region code	Country	Lat_Lon
LON030	CYC030	MN879573	TrnG-trnG2G	C1-2	South Africa	S 33.83 E 25.10
INT132	CYC132	MN879574	TrnG-trnG2G	C1-2	South Africa	S 33.76E 23.16
MAC172	CYC172	MN879575	TrnG-trnG2G	C1-2	South Africa	S 34.07 E 19.48
BUR239	CYC239	MN879576	TrnG-trnG2G	C1-2	South Africa	S 33.35 E 22.03
SUB068	CYC068	MN879577	TrnG-trnG2G	C1-2	South Africa	S 33.81 E 23.11
SES082	CYC082	MN879578	pctL-psbE	M1-2	South Africa	S 34.12E 21.37
INT274	CYC274	MN879579	pctL-psbE	M1-2	South Africa	S 33.78E 23.79
GAL382	CYC382	MN879580	pctL-psbE	M1-2	South Africa	S 34.18E 18.38
BUX360	CYC360	MN879581	pctL-psbE	M1-2	South Africa	S 33.49E 19.31
BUX360	CYC360	MN883511	atpI-atpH	S1-2	South Africa	S 33.49 E 19.3
GAL382	CYC382	MN883512	atpI-atpH	S1-2	South Africa	S 34.18 E 18.38
GEN430	CYC430	MN883513	atpI-atpH	S1-2	South Africa	S 34.07 E 18.39
LON031	CYC031	MN883514	atpI-atpH	S1-2	South Africa	S 33.82 E 25.1
SES082	CYC082	MN883515	atpI-atpH	S1-2	South Africa	S 33.86 E 23.98
SES083	CYC083	MN883516	atpI-atpH	S1-2	South Africa	S 33.86 E 23.98
SUB115	CYC115	MN930746	atpI-atpH	MLT_S1-2	South Africa	E 33.868114 S 23.984936
subternata134	CYC134	MN930747	atpI-atpH	MLT_S1-2	South Africa	E 33.878047 S 22.442321
subternata136	CYC136	MN930748	atpI-atpH	MLT_S1-2	South Africa	E 33.882573 S 22.428837
153	CYC153	MN930749	atpI-atpH	MLT_S1-2	South Africa	E 33.957536 S 21.21849
subternata156	CYC156	MN930750	atpI-atpH	MLT_S1-2	South Africa	E 33.95544 S 21.220818
SUB234	CYC234	MN930751	atpI-atpH	MLT_S1-2	South Africa	E 33.96982 S 23.68542
500	CYC500	MN930752	atpI-atpH	MLT_S1-2	South Africa	E 33.966245 S 23.651458
506	CYC506	MN930753	atpI-atpH	MLT_S1-2	South Africa	E 33.966245 S 23.651458
507	CYC507	MN930754	atpI-atpH	MLT_S1-2	South Africa	E 33.966245 S 23.651458
514	CYC514	MN930755	atpI-atpH	MLT_S1-2	South Africa	E 33.9154167175 S 23.1350269318
544	CYC544	MN930756	atpI-atpH	MLT_S1-2	South Africa	E 33.9113616943 S 22.6701946259
551	CYC551	MN930757	atpI-atpH	MLT_S1-2	South Africa	E 33.9113616943 S 22.6701946259
568	CYC568	MN930758	atpI-atpH	MLT_S1-2	South Africa	E 33.9200286865 S 22.516916275
569	CYC569	MN930759	atpI-atpH	MLT_S1-2	South Africa	E 33.9200286865 S 22.516916275
subternata593	CYC593	MN930760	atpI-atpH	MLT_S1-2	South Africa	E 33.878988 S 22.307399
601	CYC601	MN930761	atpI-atpH	MLT_S1-2	South Africa	E 33.878988 S 22.307399
subternata671	CYC671	MN930762	atpI-atpH	MLT_S1-2	South Africa	E 33.968468 S 24.217024
subternata672	CYC672	MN930763	atpI-atpH	MLT_S1-2	South Africa	E 33.968468 S 24.217024
subternata802	CYC802	MN930764	atpI-atpH	MLT_S1-2	South Africa	E 33.936073 S 23.477942
subternata803	CYC803	MN930765	atpI-atpH	MLT_S1-2	South Africa	E 33.936073 S 23.477942
subternata882	CYC882	MN930766	atpI-atpH	MLT_S1-2	South Africa	E 33.966245 S 23.651458
883	CYC883	MN930767	atpI-atpH	MLT_S1-2	South Africa	E 33.88222 S 22.39933
SUB884	CYC884	MN930768	atpI-atpH	MLT_S1-2	South Africa	E 33.88222 S 22.39933
SUB885	CYC885	MN930769	atpI-atpH	MLT_S1-2	South Africa	E 33.88222 S 22.39933
SUB886	CYC886	MN930770	atpI-atpH	MLT_S1-2	South Africa	E 33.88222 S 22.39933
SUB890	CYC890	MN930771	atpI-atpH	MLT_S1-2	South Africa	E 33.88222 S 22.39933
909	CYC909	MN930772	atpI-atpH	MLT_S1-2	South Africa	E 33.6522 S 23.135186
subternata910	CYC910	MN930773	atpI-atpH	MLT_S1-2	South Africa	E 33.6522 S 23.135186
subternata1084	CYC1084	MN930774	atpI-atpH	MLT_S1-2	South Africa	E 34.032422 S 23.223468
subternata1085	CYC1085	MN930775	atpI-atpH	MLT_S1-2	South Africa	E 34.032422 S 23.223468
subternata1098	CYC1098	MN930776	atpI-atpH	MLT_S1-2	South Africa	E 34.032422 S 23.223468
BUR-CYC130	CYC130	MN883526	TrnQ-5'rps16	T1-T2	South Africa	S 33.38 E 22.43
INT-CYC048	CYC048	MN883527	TrnQ-5'rps16	T1-T2	South Africa	S 33.79 E 23.71
PUB-CYC022	CYC022	MN883528	TrnQ-5'rps16	T1-T2	South Africa	S 33.95 E 25.46
INT-CYC049	CYC049	MN883529	TrnQ-5'rps16	T1-T2	South Africa	S 33.87 E 24.12
INT-CYC131	CYC131	MN883530	TrnQ-5'rps16	T1-T2	South Africa	S 33.38 E 22.43
INT-CYC065	CYC065	MN883531	TrnQ-5'rps16	T1-T2	South Africa	S 33.89 E 25.25
ALP196	CYC196	MN883517	ndhAx1-ndhAx2	U1-U2	South Africa	S 34.12 E 18.87
AUR188	CYC188	MN883518	ndhAx1-ndhAx2	U1-U2	South Africa	S 33.42 E 21.37
MAC168	CYC168	MN883519	ndhAx1-ndhAx2	U1-U2	South Africa	S 34.09 E 19.69
PLI194	CYC194	MN883520	ndhAx1-ndhAx2	U1-U2	South Africa	S 33.62 E 22.87
SUB077	CYC077	MN883521	ndhAx1-ndhAx2	U1-U2	South Africa	S 33.86 E 23.98
909	CYC909	MN930777	ndhAx1-ndhAx2	MLT_U1-U2	South Africa	E 33.65 S 23.13
subternata1098	CYC1098	MN930778	ndhAx1-ndhAx2	MLT_U1-U2	South Africa	E 34.03 S 23.22
153	CYC153	MN930779	ndhAx1-ndhAx2	MLT_U1-U2	South Africa	E 33.96 S 21.22
subternata156	CYC156	MN930780	ndhAx1-ndhAx2	MLT_U1-U2	South Africa	E 33.95 S 21.22
subternata672	CYC672	MN930781	ndhAx1-ndhAx2	MLT_U1-U2	South Africa	E 33.97 S 24.22
883	CYC883	MN930782	ndhAx1-ndhAx2	MLT_U1-U2	South Africa	E 33.88 S 22.40
506	CYC506	MN930783	ndhAx1-ndhAx2	MLT_U1-U2	South Africa	E 33.97 S 23.65
514	CYC514	MN930784	ndhAx1-ndhAx2	MLT_U1-U2	South Africa	E 33.91 S 23.13
544	CYC544	MN930785	ndhAx1-ndhAx2	MLT_U1-U2	South Africa	E 33.91 S 22.67
551	CYC551	MN930786	ndhAx1-ndhAx2	MLT_U1-U2	South Africa	E 33.91 S 22.67
568	CYC568	MN930787	ndhAx1-ndhAx2	MLT_U1-U2	South Africa	E 33.92 S 22.52
569	CYC569	MN930788	ndhAx1-ndhAx2	MLT_U1-U2	South Africa	E 33.92 S 22.52
601	CYC601	MN930789	ndhAx1-ndhAx2	MLT_U1-U2	South Africa	E 33.88 S 22.31
SUB115	CYC115	MN930790	ndhAx1-ndhAx2	MLT_U1-U2	South Africa	E 33.87 S 23.98
SUB234	CYC234	MN930791	ndhAx1-ndhAx2	MLT_U1-U2	South Africa	E 33.97 S 23.68
SUB884	CYC884	MN930792	ndhAx1-ndhAx2	MLT_U1-U2	South Africa	E 33.88 S 22.4
SUB885	CYC885	MN930793	ndhAx1-ndhAx2	MLT_U1-U2	South Africa	E 33.88 S 22.4
SUB886	CYC886	MN930794	ndhAx1-ndhAx2	MLT_U1-U2	South Africa	E 33.88 S 22.4
SUB890	CYC890	MN930795	ndhAx1-ndhAx2	MLT_U1-U2	South Africa	E 33.88 S 22.4
subternata1084	CYC1084	MN930796	ndhAx1-ndhAx2	MLT_U1-U2	South Africa	E 34.03 S 23.22
subternata1085	CYC1085	MN930797	ndhAx1-ndhAx2	MLT_U1-U2	South Africa	E 34.03 S 23.22
subternata134	CYC134	MN930798	ndhAx1-ndhAx2	MLT_U1-U2	South Africa	E 33.88 S 22.44
subternata136	CYC136	MN930799	ndhAx1-ndhAx2	MLT_U1-U2	South Africa	E 33.88 S 22.43
subternata593	CYC593	MN930800	ndhAx1-ndhAx2	MLT_U1-U2	South Africa	E 33.88 S 22.31
subternata671	CYC671	MN930801	ndhAx1-ndhAx2	MLT_U1-U2	South Africa	E 33.97 S 24.22
subternata802	CYC802	MN930802	ndhAx1-ndhAx2	MLT_U1-U2	South Africa	E 33.94 S 23.48
LON028	CYC028	MN883522	rpl32-trnL	V1-V2	South Africa	S 33.73 E 25.08
LON031	CYC031	MN883523	rpl32-trnL	V1-V2	South Africa	S 33.82 E 25.1
INT044	CYC044	MN883524	rpl32-trnL	V1-V2	South Africa	S 33.81 E 25.11
SES038	CYC038	MN883525	rpl32-trnL	V1-V2	South Africa	S 33.82 E 25.09
